# Supplementary material
Source: publisher figshare collection journal article supplement (https://karger.figshare.com/ndownloader/files/31071433)
Supplement: Supplementary file 1 [file 31071433]

**Supplementary Table 1. Comparison of sociodemographic and cannabis use characteristics between cannabis abuse and cannabis dependence cases in the general population**

|  | **Cannabis**  **abuse**  **(n=90)** | **Cannabis dependence**  **(n=90)** | **χ2 or t-test score** | **p-value** |
| --- | --- | --- | --- | --- |
| **Sex** |  |  |  |  |
| Male | 77.5 | 83.1 | 0.62 | 0.4331 |
| Female | 22.6 | 16.9 |  |  |
| **Age group** |  |  |  |  |
| 15-19 | 33.5 | 15.2 | 0.43 | 0.053 |
| 20-24 | 18.1 | 36.6 |  |  |
| 25-34 | 31.0 | 36.4 |  |  |
| 35-64 | 17.4 | 11.7 |  |  |
| 65+ | 0 | 0 |  |  |
| Mean | 26.5 | 26.0 | t=-0.3 | 0.77 |
| **Marital status** |  |  |  |  |
| Single/never married | 73.9 | 69.5 | 0.52 | 0.58 |
| Married/cohabiting | 24.2 | 25.7 |  |  |
| Divorced/separated/widowed | 2.0 | 4.8 |  |  |
| **Education** |  |  |  |  |
| Primary/none | 19.7 | 22.6 | 0.61 | 0.61 |
| Completed secondary | 14.9 | 15.9 |  |  |
| Completed third level | 21.2 | 29.6 |  |  |
| Still in education | 44.2 | 32.0 |  |  |
| **Age ceased education** |  |  |  |  |
| Before 16 years | 24.3 | 9.7 | 0.16 | 0.09 |
| **Employment** |  |  |  |  |
| Employed | 38.0 | 44.0 | 0.4 | 0.75 |
| Unemployed | 24.8 | 28.4 |  |  |
| Student | 30.4 | 21.4 |  |  |
| Other | 6.9 | 6.2 |  |  |
| **Dependent children** |  |  |  |  |
| Living with dependent children | 10.2 | 15.5 | 1.42 | 0.39 |
| **Region of residence** |  |  |  |  |
| Dublin | 36.4 | 32.0 | 0.19 | 0.66 |
| Rest of Ireland | 63.6 | 68.0 |  |  |
| **Age first cannabis use** |  |  |  |  |
| <16 years | 23.1 | 33.3 | 2.9 | 0.25 |
| Mean | 17.1 | 17.0 | t=-0.08 | 0.93 |
| **Age started regular use** |  |  |  |  |
| Mean | 18.0 | 18.0 | t=0.07 | 0.94 |
| **Other illicit drug use** |  |  |  |  |
| Last year | 43.0 | 50.8 | 0.61 | 0.44 |
| Last month | 23.7 | 20.0 | 0.22 | 0.64 |
| **Alcohol dependence** |  |  |  |  |
| Yes, in last year | 44.4 | 33.4 | 1.26 | 0.26 |
